# Supplementary material for: Somatic Genomics and Clinical Features of Lung Adenocarcinoma: A Retrospective Study
Source: PLoS Med. 2016 Dec 6;13(12):e1002162. doi: 10.1371/journal.pmed.1002162 (PMC5140047; doi:10.1371/journal.pmed.1002162)
Supplement: S2 Table — (XLS) [file pmed.1002162.s008.xls]

## Sheet: Sheet1
The associations between somatic mutation signatures and smoking behaviors, stage and presurgery chemo therapy.
P_Values	AT_CG	AT_GC	AT_TA	CG_AT	CG_AT_CpG	CG_GC	CG_GC_CpG	CG_TA	CG_TA_CpG	Total_Number_of_mutations	Transversion_Ratio
STAGE	0.361546	0.885975	0.490849	0.526642	0.889376	0.912851	0.0412973	0.774063	0.565419	0.8459	0.684
CIGT_SMOKE_STATUS	0.310885	0.302346	0.0742307	0.0013691	0.000668938	0.533556	0.285762	0.000507962	0.000147817	0.007216	0.0001662
CIGT_PER_DAY	0.856142	0.744785	0.436692	0.003705	0.00620639	0.0678382	0.226249	0.0141406	0.00164199	0.02009	0.008988
CIGT_TOT_DURATION	0.0129971	0.920439	0.207717	0.270002	0.0102815	0.609225	0.0846887	0.410638	0.00431836	0.01151	0.1115
CHEMO_PRESURG	0.904906	0.244754	0.0682186	0.12655	0.170407	0.311395	0.835243	0.0123346	0.880054	0.08157	0.06273
Pearson correlation coefficient	AT_CG	AT_GC	AT_TA	CG_AT	CG_AT_CpG	CG_GC	CG_GC_CpG	CG_TA	CG_TA_CpG	Total_Number_of_mutations	Transversion_Ratio
STAGE	0.0917398	0.0144478	-0.0693344	-0.063729	-0.0140141	-0.0110269	-0.203444	-0.0289179	0.0578682	-0.0195778	-0.040998
CIGT_SMOKE_STATUS	-0.102357	-0.10417	0.179323	0.315844	0.334548	-0.0629888	0.10779	-0.341436	-0.370529	0.267127	0.367887
CIGT_PER_DAY	0.018358	-0.0329579	0.0786473	0.28768	0.27191	-0.183362	0.122089	-0.244701	-0.310902	0.232197	0.260012
CIGT_TOT_DURATION	-0.247617	-0.0101149	0.127073	0.111362	0.255558	0.0517342	0.173282	-0.0831802	-0.283089	0.251759	0.160136
CHEMO_PRESURG	-0.0125753	-0.116947	0.182985	0.153414	0.137719	-0.101859	0.0214285	-0.250871	-0.0157189	0.174792	0.186738
